# Supplementary material
Source: publisher figshare collection journal article supplement (https://frontiersin.figshare.com/ndownloader/files/28426782)
Supplement: Supplementary file [file 28426782]

**Table 1. Median and IQR of genetic counselor access to care (state-level median of drive-times to the nearest genetic counselor, weighted by cancer incidence rates) for cancer patients by U.S. region**

| <b>Region</b>    | <b>Median of access / mins</b> | <b>IQR of access / mins</b> |
|------------------|--------------------------------|-----------------------------|
| <b>Midwest</b>   | 55.6                           | 61.7                        |
| <b>Northeast</b> | 31.3                           | 22.8                        |
| <b>South</b>     | 53.6                           | 30.0                        |
| <b>West</b>      | 80.7                           | 37.2                        |
